# Supplementary material
Source: publisher site journal article supplement (https://en-cdn.bio-protocol.org/attached/file/20211102/4219%20Supplementary%20file%20G%20code%20s1.docx)
Supplement: Supplementary file 1 [file 4219%20Supplementary%20file%20G%20code%20s1.docx]

Example of G-code used for z-printing. Should not that each g-code is specific to each printer and print and would need to be optimised for each application.

| % | M97 | M97 |
| --- | --- | --- |
|  | F10 G1 Z5.23 | F10 G1 Z5.23 |
|  | M96 | M96 |
| (gel printing) | G0 Z5 | G0 Z5 |
| G90 G94 | G0 X1 | x1 |
| G0 Z30 | G0 Z-10.23 | G0 Z-10.23 |
| M99 | G91 | G91 |
| M90 P2 D2 | M97 | M97 |
| M95 P1 | F10 G1 Z5.23 | F10 G1 Z5.23 |
| (Start Block 1) | M96 | M96 |
| (Line 1) | G0 Z5 | G0 Z5 |
| G0 X-13.5 Y4.5 | X1 | x1 |
| G0 Z0.1 | G0 Z-10.23 | G0 Z-10.23 |
| G91 | G91 | G91 |
| M97 | x-1 | x1 |
| F10 G1 Z5.23 | x-1 | x1 |
| M96 | x-1 | (start line 4) |
| G0 Z5 | (start line 3) | Y-1 |
| (start line 2) | Y-1 | x-1 |
| Y-1 | X1 | x-1 |
| x-1 | X1 | x-1 |
| x-1 | x1 | x-1 |
| x-1 | x1 | (start line 5) |
| x-1 | (start line 4) | Y-1 |
| (start line 3) | Y-1 | X1 |
| Y-1 | x-1 | X1 |
| X1 | x-1 | x1 |
| X1 | x-1 | x1 |
| x1 | x-1 | (end of block 3) |
| x1 | (start line 5) |  |
| (start line 4) | Y-1 |  |
| Y-1 | X1 |  |
| x-1 | X1 |  |
| x-1 | x1 |  |
| x-1 | x1 |  |
| x-1 | (end of block 2) |  |
| (start line 5) | G90 |  |
| Y-1 | X15.5 Y4.5 |  |
| X1 | G91 |  |
| X1 | X1 |  |
| x1 | X1 |  |
| x1 | x1 |  |
| (end of block 1) | x1 |  |
| G90 | (start line 2) |  |
| X0.5 Y4.5 | Y-1 |  |
| G91 | x-1 |  |
| X1 | x-1 |  |
| X1 | x-1 |  |
| x1 | x-1 |  |
| x1 | (start line 3) |  |
| (start line 2) | Y-1 |  |
| Y-1 | X1 |  |
| x-1 | X1 |  |
